# Supplementary material for: Computational Simulation of the Activation Cycle of Gα Subunit in the G Protein Cycle Using an Elastic Network Model
Source: PubMed Central journal article supplement (PMC4970668; doi:10.1371/journal.pone.0159528), 2016-08-02
Supplement: pone.0159528.s009.pdf [file pone.0159528.s009.pdf]

**S1 Table**

Stiffness values in MWCENM

| Connection type       | Stiffness ratio   | Cutoff condition                                                |
|-----------------------|-------------------|-----------------------------------------------------------------|
| Backbone (covalent)   | 100               | Residue number (between ith and [i+1]th)                        |
| Backbone (non-bonded) | 1                 | Residue number (between ith and [i+2/i+3]th)                    |
| Disulfide bond        | 100               | PDB information                                                 |
| Hydrogen bond         | 10                | HBPLUS*                                                         |
| Salt-bridge           | 10                | Distance between charged residues < 4Å                          |
| Van der Waals force†  | 1                 | Non-bonded distance < 4Å                                        |
|                       | $(4 / d_{i,j})^8$ | $4\text{Å} \leq \text{Nonbonded distance}, d_{i,j} < 8\text{Å}$ |

\*HBPLUS is a program used to calculate all possible hydrogen bonds within a protein.

†The stiffness ratio for the second range of Van der Waals force interaction is only fitted by the attractive term of the Lennard-Jones potential.
