# Supplementary material for: Computational Simulation of the Activation Cycle of Gα Subunit in the G Protein Cycle Using an Elastic Network Model
Source: PubMed Central journal article supplement (PMC4970668; doi:10.1371/journal.pone.0159528), 2016-08-02
Supplement: pone.0159528.s010.pdf [file pone.0159528.s010.pdf]

**S2 Table**

Change of solvent-accessible surface area at nucleotide pocket region and GDP in R-G $\alpha\beta\gamma$ (GDP) through the open motion

| Region                               | $\beta 6-\alpha 5$ | P-loop | Switch2 | GDP   | Total  |
|--------------------------------------|--------------------|--------|---------|-------|--------|
| residue range                        | 365-369            | 49-54  | 223-228 | 413   | n/a    |
| Initial structure ( $\text{\AA}^2$ ) | 293.0              | 379.0  | 289.6   | 322.5 | 1284.1 |
| NM structure ( $\text{\AA}^2$ )      | 305.1              | 381.8  | 294.4   | 328.2 | 1309.5 |

Solvent-accessible surface area is calculated with PyMOL with 1  $\text{\AA}$  solvent radius.
